# Supplementary material for: Barrier-to-Autointegration Factor (BAF) involvement in prelamin A-related chromatin organization changes
Source: PubMed Central journal article supplement (PMC4941268; doi:10.18632/oncotarget.6697), 2015-12-20
Supplement: oncotarget-07-15662-s001.pdf [file oncotarget-07-15662-s001.pdf]

## Barrier-to-Autointegration Factor (BAF) involvement in prelamin A-related chromatin organization changes

### Supplementary Materials

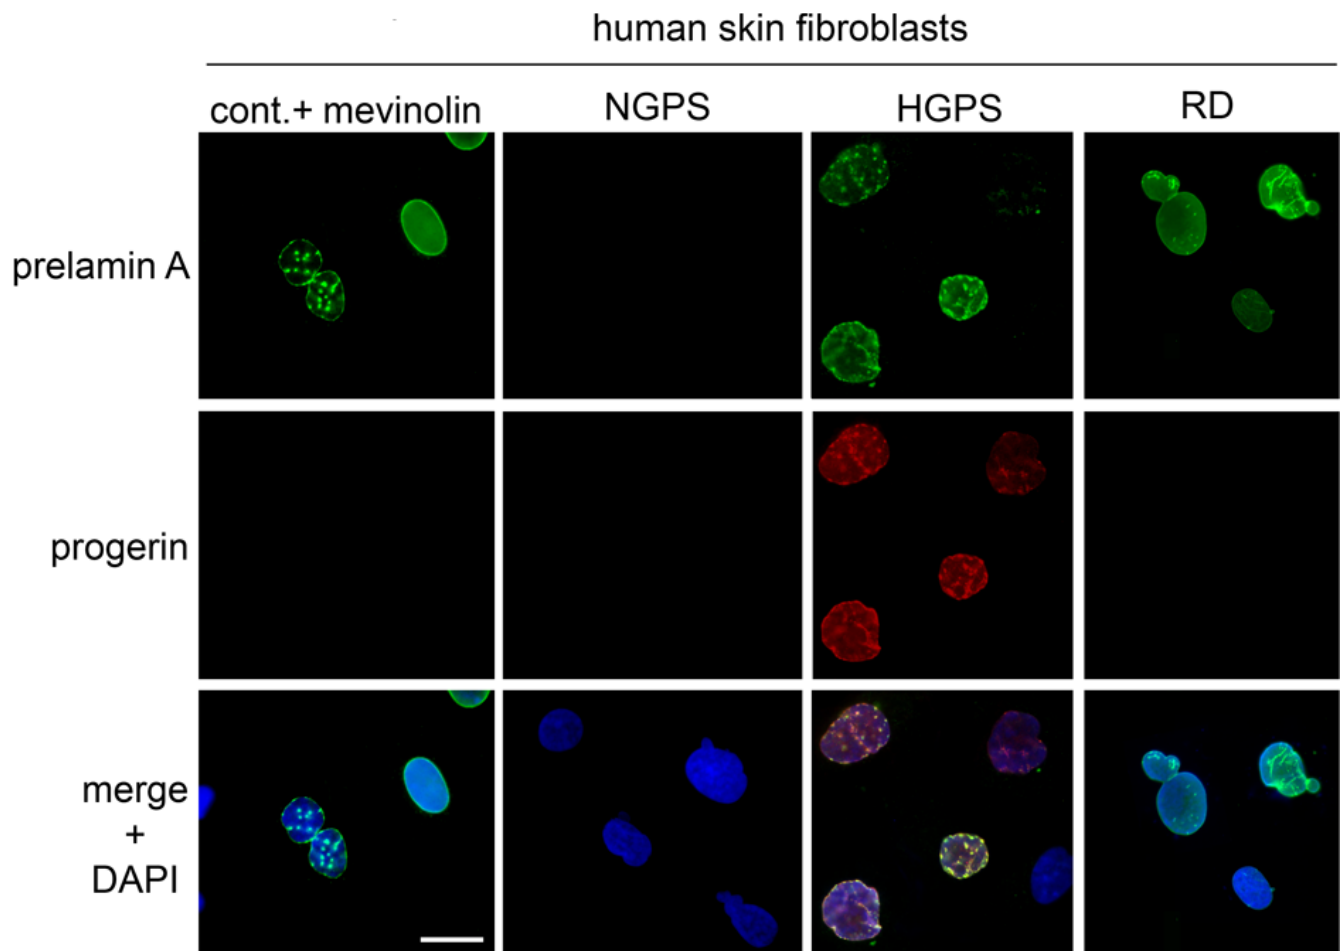

**Supplementary Figure S1: Prelamin A and progerin evaluation in NGPS cells.** Prelamin A (green) and progerin (red) immunofluorescence evaluation in skin fibroblasts from Nestor-Guillermo Progeria Syndrome (NGPS), Hutchinson-Gilford Progeria Syndrome (HGPS), Restrictive Dermopathy (RD) patients and control cells treated with mevinolin (cont. + mevinolin). Prelamin A and progerin immunofluorescence staining were merged with DAPI (merge + DAPI). Bar 10  $\mu$ m.

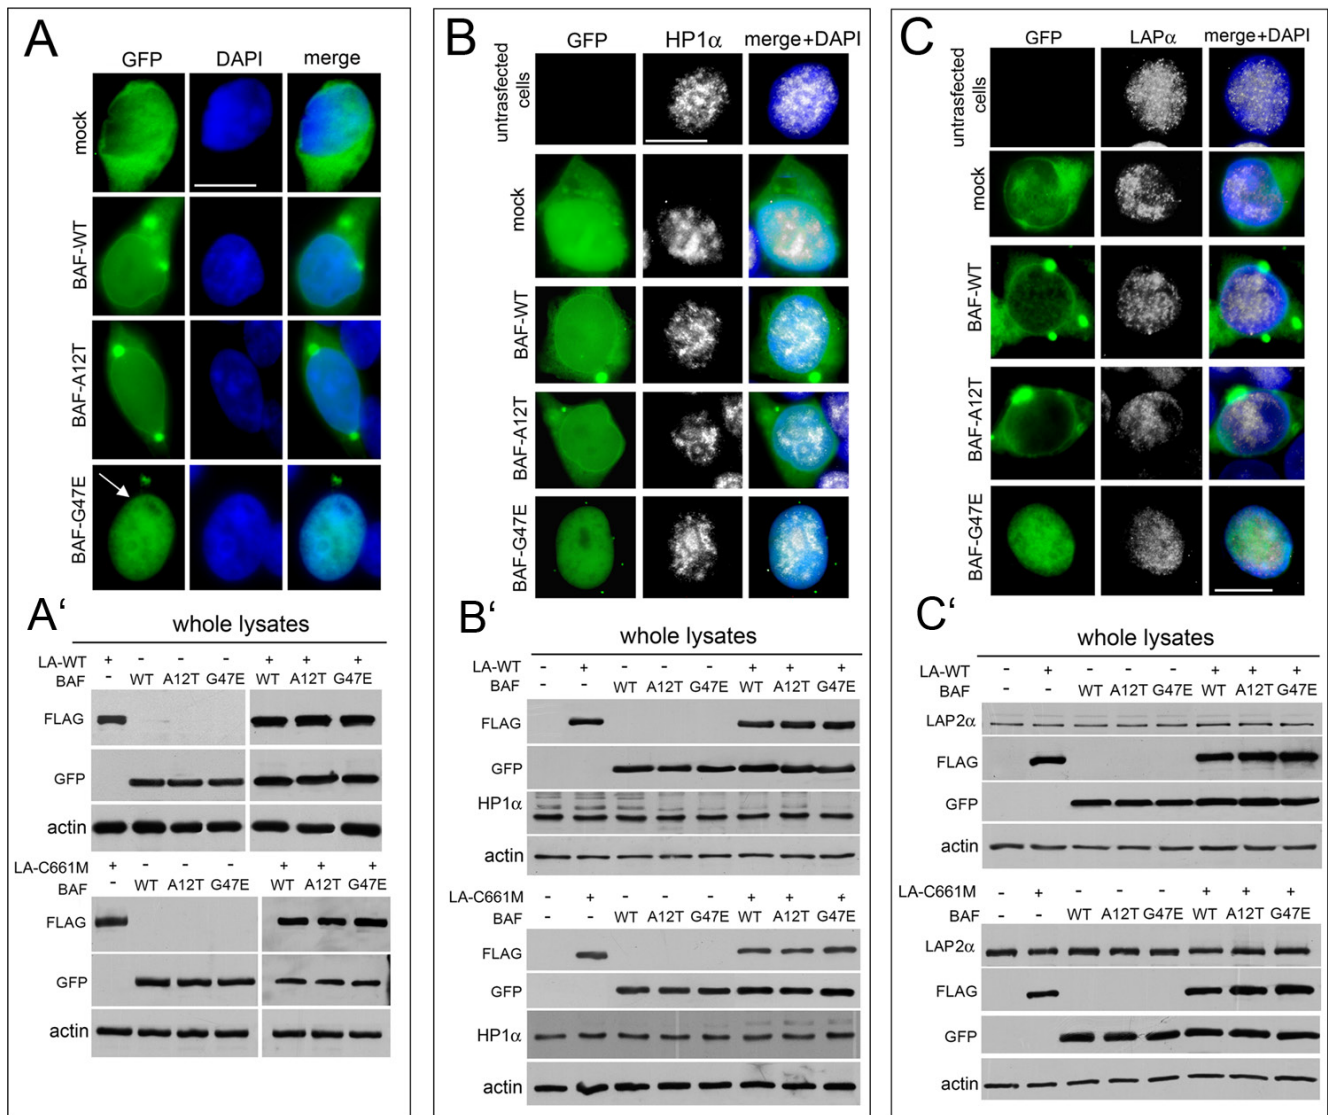

**Supplementary Figure S2: GFP-BAF mutants localization and expression in HEK293 cells.** Evaluation of effects on HP1-alpha and LAP2-alpha localization and FLAG-tagged proteins expression. **(A)** GFP-empty vector (mock), BAF-WT, BAF-A12T and BAF-G47E localization in HEK293 cells. Arrow: nucleoplasmic distribution of BAF-G47E mutant. GFP (green), DNA staining (DAPI) and merge are shown. Bar 10  $\mu$ M. **A')** Western blotting analysis of FLAG and GFP-tagged proteins in total lysates of HEK293 cells expressing GFP-tagged proteins or FLAG-tagged proteins in a single or double transfection experiments. Actin: protein loading control. **(B)** HP1 $\alpha$  localization in GFP-empty vector (mock), BAF-WT, BAF-A12T and BAF-G47E expressing cells. GFP (green), HP1-alpha (grey) and DNA staining (DAPI) are merged and shown in the right column. Bar 10  $\mu$ M. **B')** Western blotting analysis of HP1 $\alpha$  in untransfected cells and in cells expressing GFP-tagged or FLAG-tagged proteins, in a single and double transfection experiments. Actin: protein loading control. **(C)** LAP2 $\alpha$  localization in GFP-empty vector (mock), BAF-WT, BAF-A12T, and BAF-G47E expressing cells. GFP (green), LAP2 $\alpha$  (grey) and DNA staining (DAPI) are merged and shown at the right column. Bar 10  $\mu$ M. **C')** Western blotting analysis of LAP2 $\alpha$ , and FLAG immunoblotted total lysates of untransfected cells and cells expressing GFP-tagged proteins or FLAG-tagged proteins in a single and double transfection experiments. Actin: protein loading control.

## HEK293 cells

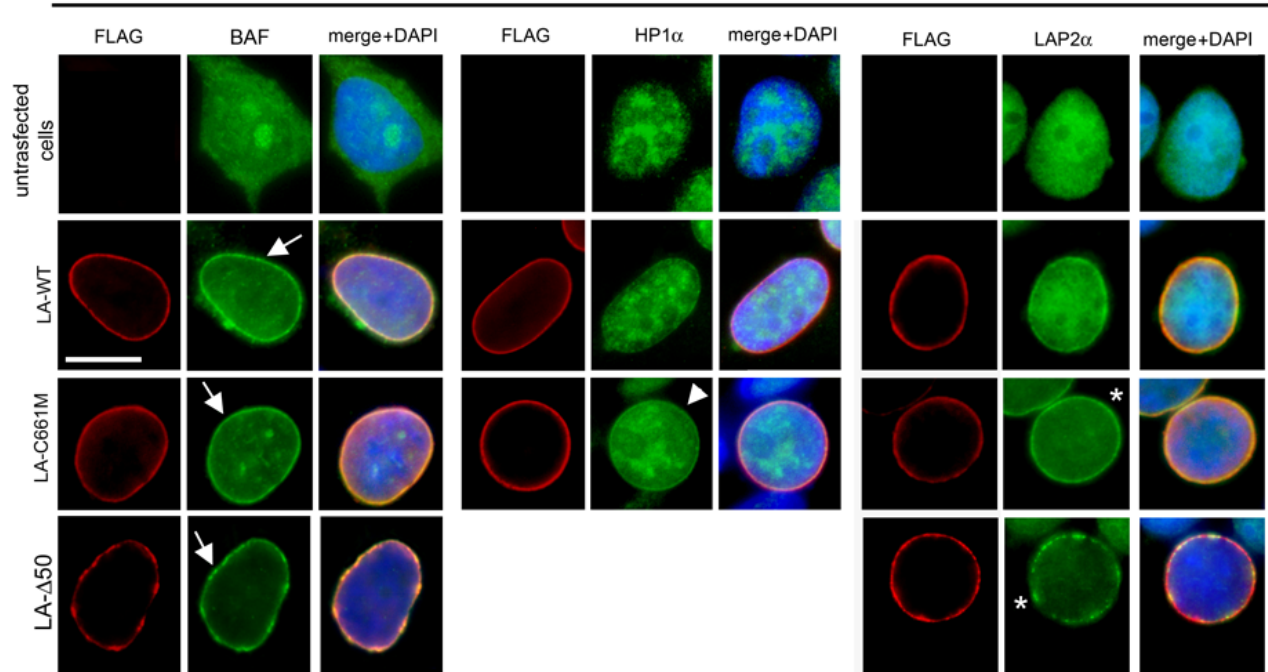

**Supplementary Figure S3: Localization of endogenous BAF, HP1-alpha and LAP2-alpha in HEK293 cells expressing prelamin A constructs.** Immunofluorescence evaluation of endogenous BAF, HP1 $\alpha$  and LAP2 $\alpha$  in HEK293 cells transfected with lamin A constructs. FLAG-tagged protein (red) are: wild type lamin A (LA-WT), prelamin A (LA-C661M) and progerin (LA- $\Delta$ 50). Arrows: BAF nuclear recruitment; arrowheads: HP1 $\alpha$  nuclear periphery increase; asterisks: LAP2 $\alpha$  nuclear periphery localization. Nuclei were counterstained with DAPI. Bar 10  $\mu$ m.

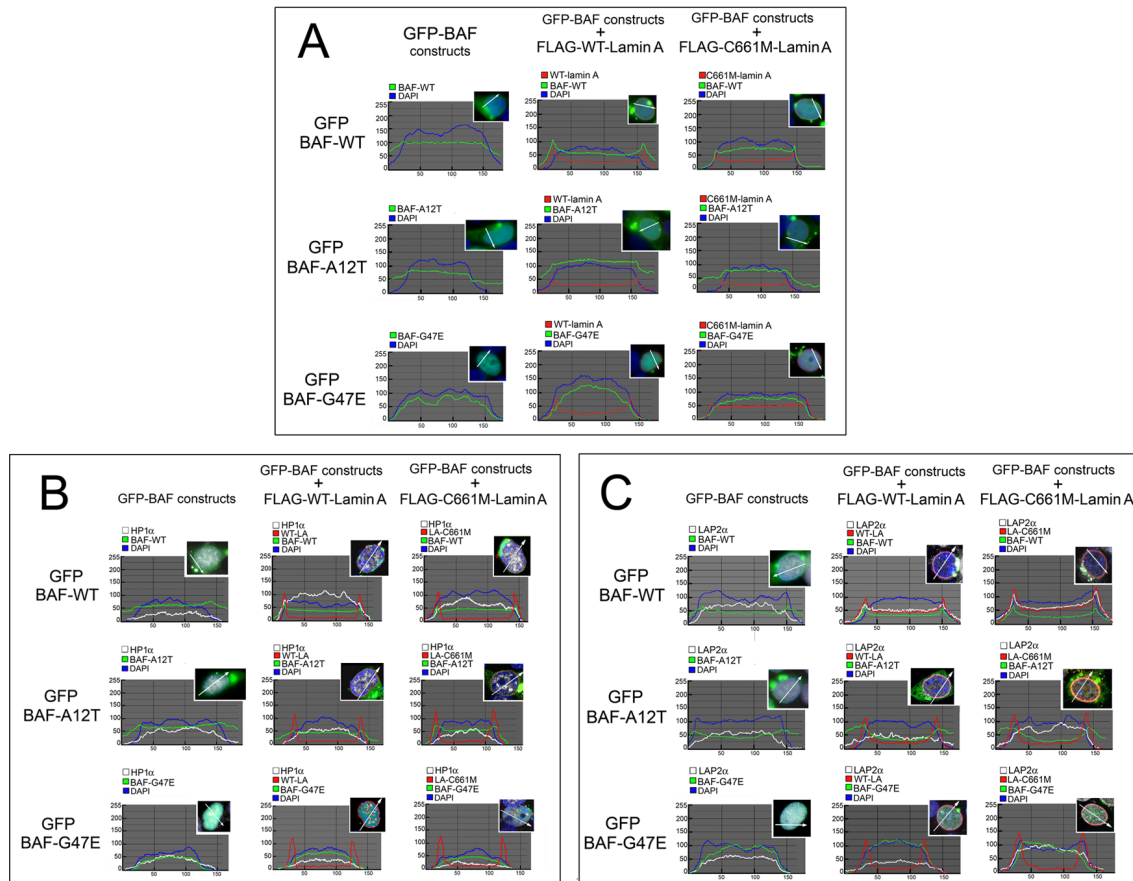

**Supplementary Figure S4: Evaluation of GFP-BAF mutants colocalization with FLAG-prelamin A tagged proteins, HP1-alpha and LAP2-alpha in HEK293 cells.** (A) GFP-BAF constructs colocalization with FLAG-prelamin A constructs. In left graphs line is reported the GFP-BAF constructs staining intensity profiles along the arrow drawn on the cell showed inside each graph. Intensity profiles of GFP-BAF-WT, GFP-BAF-A12T and GFP-BAF-G47E (green) and DAPI (blue) are reported in graphs. In central graph line intensity profiles along arrows drawn on cells showed inside each graph of GFP-BAF mutants (green), FLAG-lamin A-WT (red) and DNA (DAPI, blue) staining are reported. In the right graphs line intensity profiles of GFP-BAF mutants (green), FLAG-lamin A-C661M (red) and DNA (DAPI, blue) are shown. (B) GFP-BAF constructs colocalization with FLAG-prelamin A constructs and HP1 $\alpha$ . Intensity profiles of GFP-BAF-WT, GFP-BAF-A12T and GFP-BAF-G47E (green), HP1 $\alpha$  (white) and DNA staining with DAPI (blue) are reported in left line graphs. In central graphs intensity profiles of GFP-constructs (green), FLAG-lamin A-WT (red), HP1 $\alpha$  and DNA (DAPI, blue) staining measured along arrows droved on the cell showed inside each graph is reported. In the right graphs line the intensity profiles of GFP-BAF constructs (green), FLAG-lamin A-C661M (red), HP1 $\alpha$  (white) and DNA (DAPI, blue) staining are shown. (C) GFP-BAF constructs colocalization with FLAG-prelamin A constructs and LAP2 $\alpha$ . Intensity profiles of GFP-BAF-WT, GFP-BAF-A12T and GFP-BAF-G47E (green), LAP2 $\alpha$  (white) and DNA staining with DAPI (blue) are reported in graphs showed in left line. In central graphs intensity profiles of GFP-BAF constructs (green), FLAG-lamin A-WT (red), LAP-alpha (white) and DNA (DAPI, blue) staining measured along arrows droved on the cell showed inside each graph are reported. In the right graphs line intensity profiles of GFP-BAF constructs (green), FLAG-lamin A-C661M (red), LAP2 $\alpha$  (white) and DNA (DAPI, blue) staining are shown.

## densitometric analysis

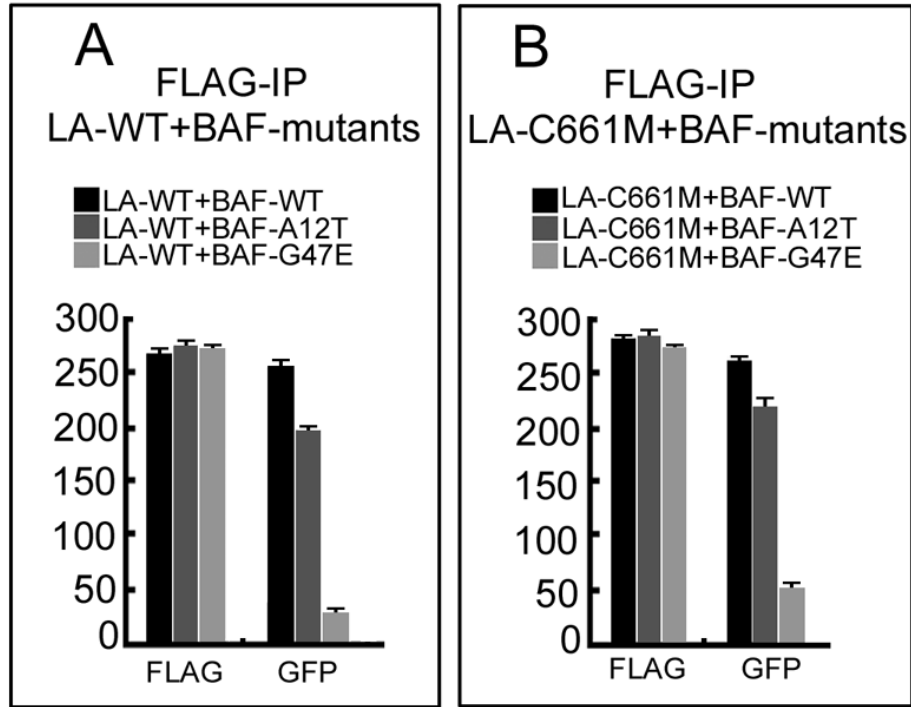

**Supplementary Figure S5: Densitometric analysis of coimmunoprecipitation experiments performed in HEK293 transfected cells.** Statistical analysis of densitometric bands obtained by Western blotting evaluation of coimmunoprecipitation experiments performed in HEK293 cells expressing FLAG-tagged protein in combination with BAF-WT or BAF-A12T or BAF-G47E. Densitometric analysis of FLAG and GFP immunoblotted bands was performed in triplicate experiments, and the mean values  $\pm$  S.D. are reported.
